# Supplementary material for: Facile design of renewable lignin copolymers by photoinitiated RAFT polymerization as Pickering emulsion stabilizers
Source: Royal Society of Chemistry journal article supplement (doi:10.1039/d3gc01500a), 2023-01-01
Supplement: d3gc01500a1.pdf [file d3gc01500a1.pdf]

## Facile Design of Renewable Lignin Copolymers by Photoinitiated RAFT Polymerization as Pickering Emulsions Stabilizers

Jingyi Liu<sup>a†</sup>, Xiaoyu Shi<sup>a†</sup>, Lin Ma<sup>a</sup>, Daihui Zhang<sup>\*a,b,c</sup>, Chenhuan Lai<sup>\*c</sup>, Chunpeng  
Wang<sup>a,b,c</sup>, Mi Li<sup>d</sup>, Arthur J Ragauskas<sup>d,e,f</sup>, Fuxiang Chu<sup>a,b,c</sup> and Yuzhi Xu<sup>\*a,b,c</sup>

a. Institute of Chemical Industry of Forest Products, Chinese Academy of Forestry, Nanjing 210042, China.

b. Research Institute of Forestry New Technology, Chinese Academy of Forestry, Beijing 100091, China.

c. Co-Innovation Center of Efficient Processing and Utilization of Forest Resources, Jiangsu Province, Nanjing Forestry University, Nanjing 210037, China.

d. Center for Renewable Carbon, School of Natural Resources, The University of Tennessee, Knoxville, TN 37996, USA

e. Department of Chemical and Biomolecular Engineering, University of Tennessee, Knoxville, TN, 37996, USA

f. Joint Institute for Biological Science, Oak Ridge National Laboratory, Oak Ridge, TN, 37831, USA

† These authors contributed equally to this work.

### Corresponding Authors

D. Zhang, E-mail: [daihui.zhang@mail.mcgill.ca](mailto:daihui.zhang@mail.mcgill.ca)

C. Lai, Email: [lch2014@njfu.edu.cn](mailto:lch2014@njfu.edu.cn)

Y. Xu, E-mail: [xuyuzz@163.com](mailto:xuyuzz@163.com)

**Table S1. The content of modified groups in different lignin-based chain transfer agents.**

| Sample Label | Sample (mg) | P-nitrobenzaldehyde (mg) | Content of modified groups (mmol/g) |
|--------------|-------------|--------------------------|-------------------------------------|
| DL-EBPL      | 6.2         | 3.3                      | 2.17                                |
| DL-MBB       | 8.2         | 2.1                      | 1.74                                |
| DL-BM        | 5.6         | 2.9                      | 0.39                                |

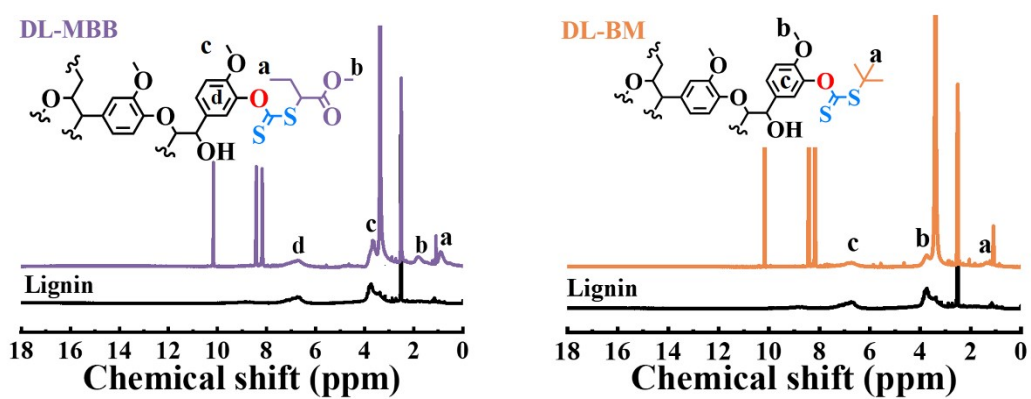

**Figure S1. <sup>1</sup>H NMR spectra of the DL-MBB and DL-BM**

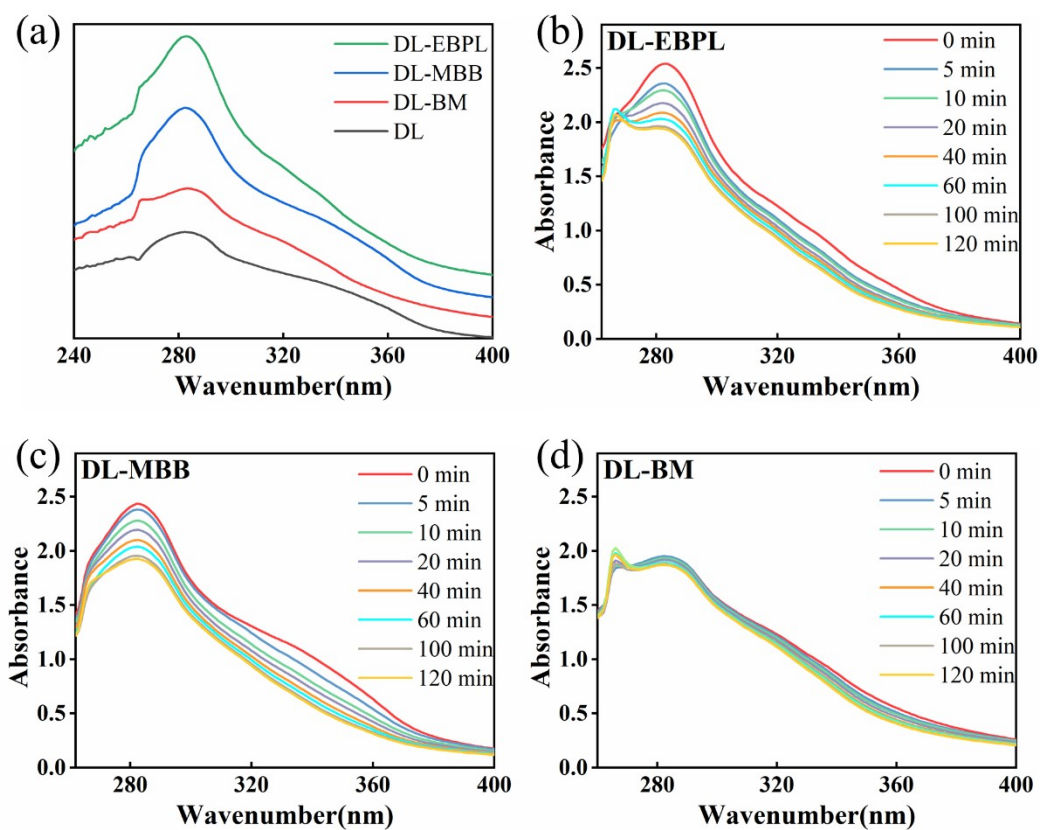

**Figure S2.** UV-vis absorption spectra for DL, DL-EBPL, DL-MBB and DL-BM in DMF and the steady state photolysis of them with 365 nm LED irradiation.

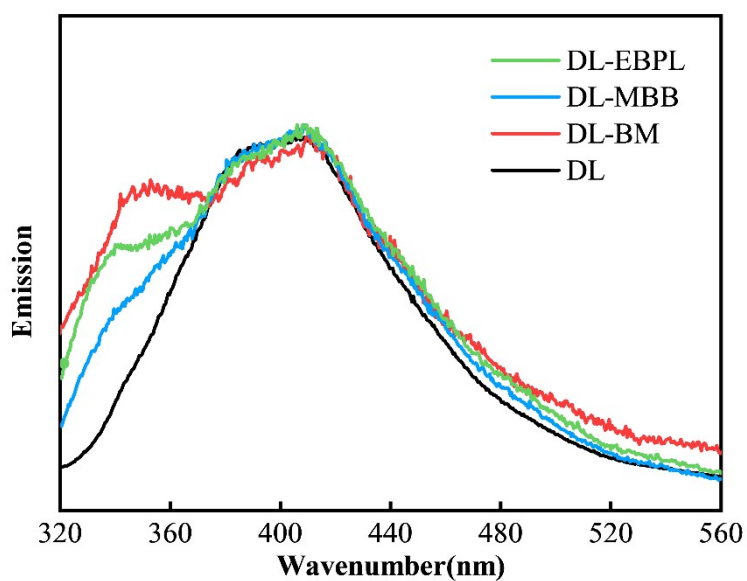

**Figure S3.** Emission (300 nm excitation) spectra of different lignin-based chain transfer agents and lignin in DMF.

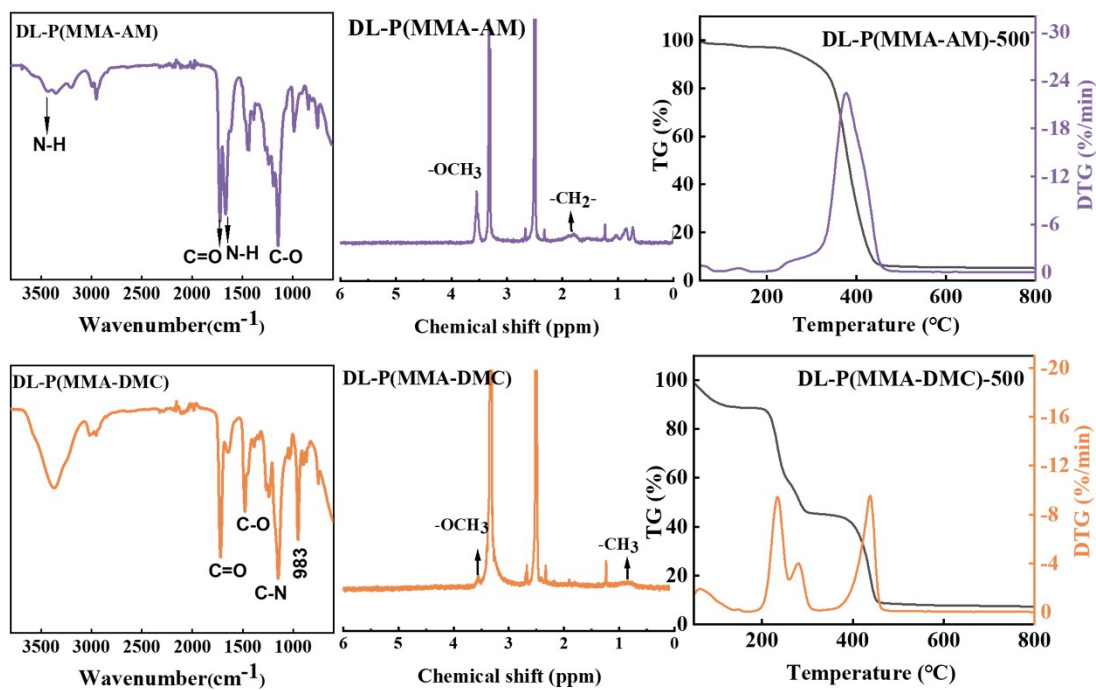

**Figure S4.** FT-IR, <sup>1</sup>H NMR, weight loss and weight loss rate of the DL-P(MMA-AM) and DL-P(MMA-DMC) copolymers.

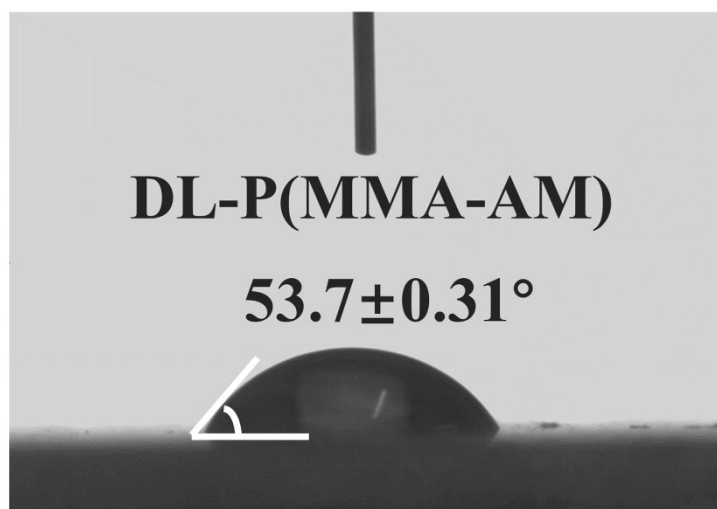

**Figure S5.** Contact angle of control (water on the glass surface)

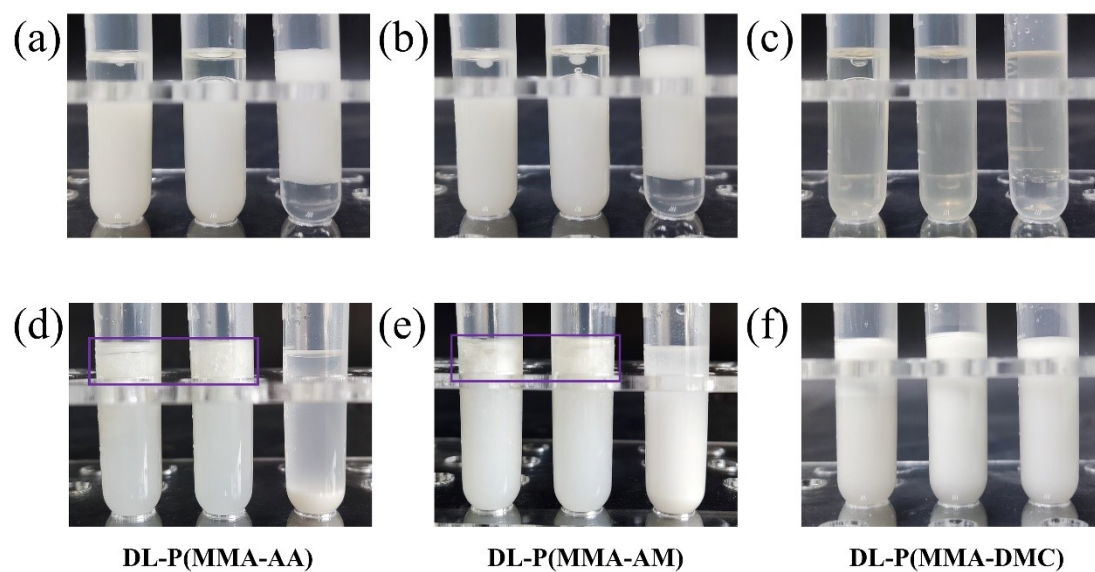

**Figure S6.** Photographs of emulsions before homogenization (a, b and c) and Pickering emulsions after homogenization for 60 s, RO/W =5:1, represented here by: (a)(d) LCNP(DL-P(MMA-DMC)), (b)(e) LCNP(DL-P(MMA-AM)) and (c)(f) LCNP(DL-P(MMA-AA)). From left to right, in each case (a–f): FAME, S200 and EGDA.
